# Supplementary material for: ZnO/ZnS heterostructures for hydrogen production by photoelectrochemical water splitting
Source: Royal Society of Chemistry journal article supplement (doi:10.1039/c6ra03501a), 2016-01-01
Supplement: c6ra03501a1.pdf [file c6ra03501a1.pdf]

**ZnO/ZnS heterostructures for hydrogen production by photoelectrochemical  
water splitting**

**R. Sánchez-Tovar, R.M. Fernández-Domene, M.T. Montañés, A. Sanz-Marco,  
J. Garcia-Antón\***

*Ingeniería Electroquímica y Corrosión (IEC). Departamento de Ingeniería Química y  
Nuclear. ETSI Industriales. Universitat Politècnica de València. Camino de Vera s/n,  
46022 Valencia, Spain.*

*Tel. 34-96-387 76 32, Fax. 34-96-387 76 39, e-mail: [jgarciaa@iqn.upv.es](mailto:jgarciaa@iqn.upv.es)*

a)

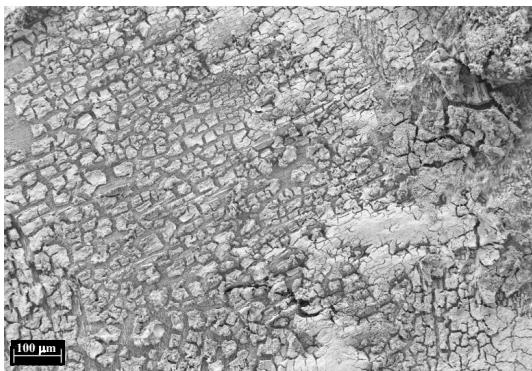

b)

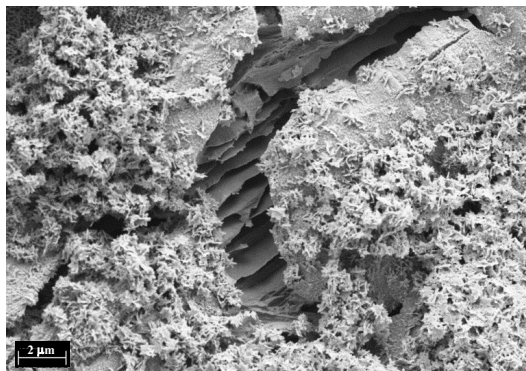

c)

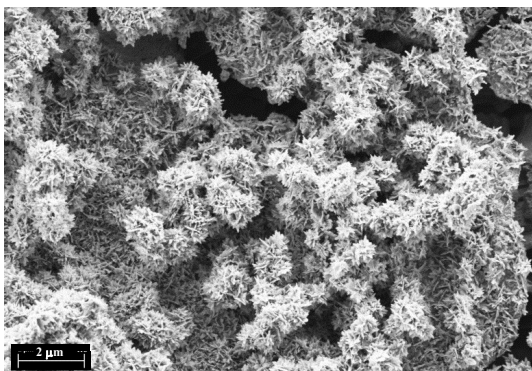

d)

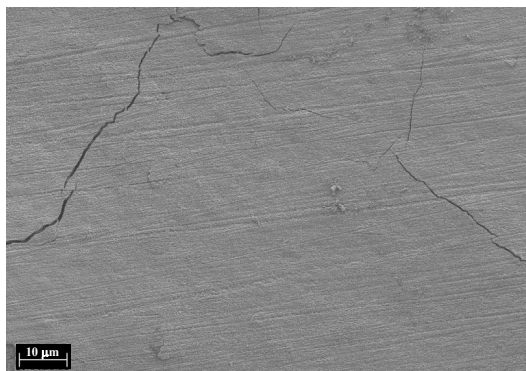

e)

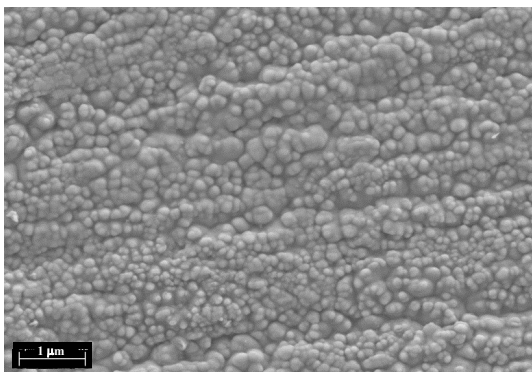

f)

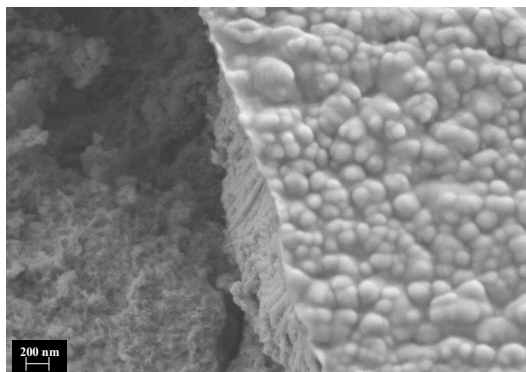

**Figure S1.** FE-SEM images of the ZnO/ZnS heterostructures anodized under static (a-c) and dynamic conditions (d-f) in 0.06M Na<sub>2</sub>S+0.0125M water electrolytes.

a)

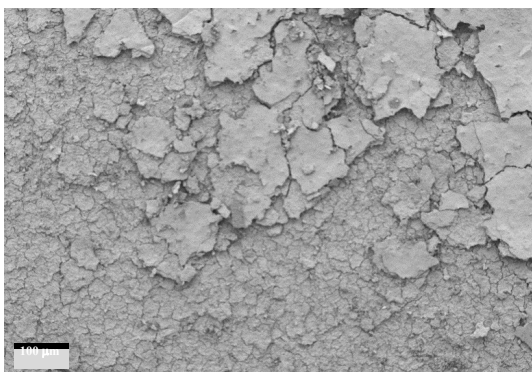

b)

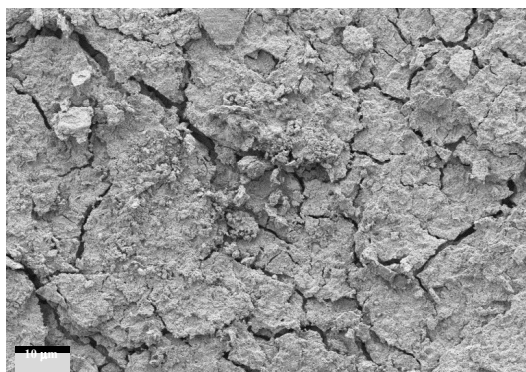

c)

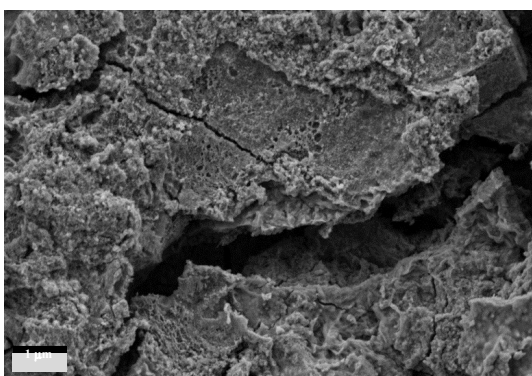

d)

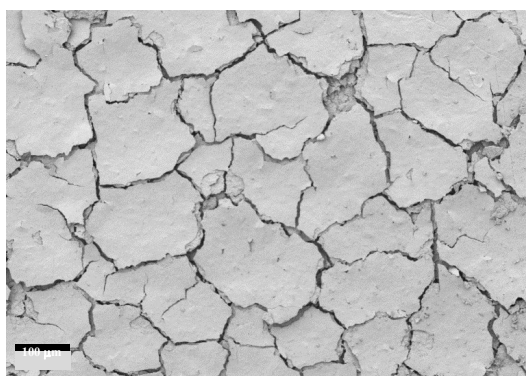

e)

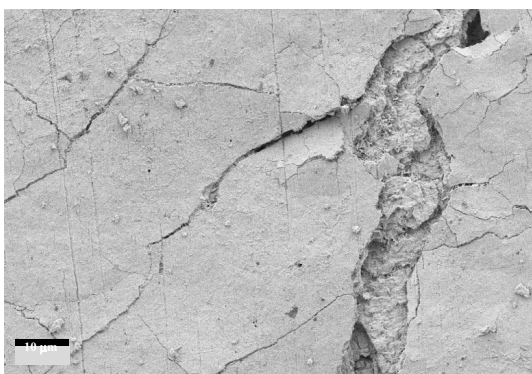

f)

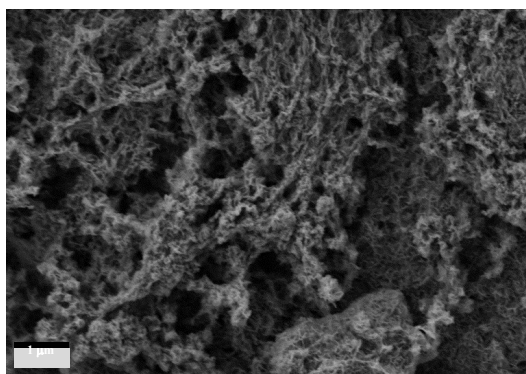

**Figure S2.** FE-SEM images of the ZnO/ZnS heterostructures anodized under static (a-c) and dynamic (d-f) conditions in 0.2 M Na<sub>2</sub>S+0.0125M water electrolytes.

a)

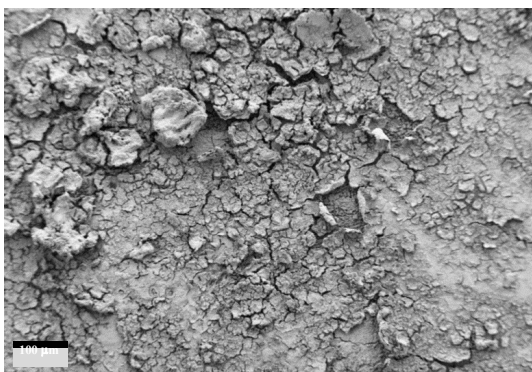

b)

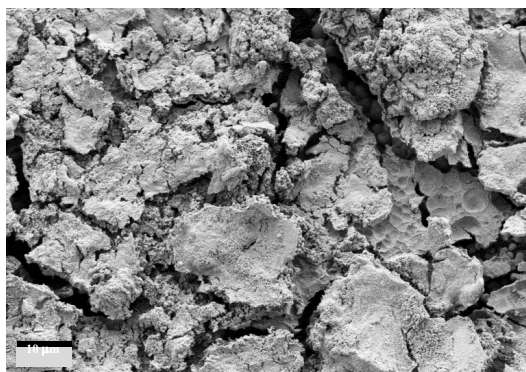

c)

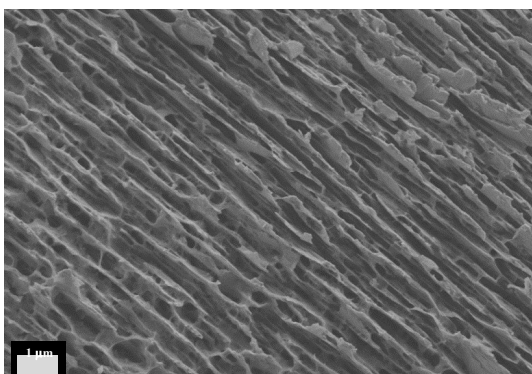

d)

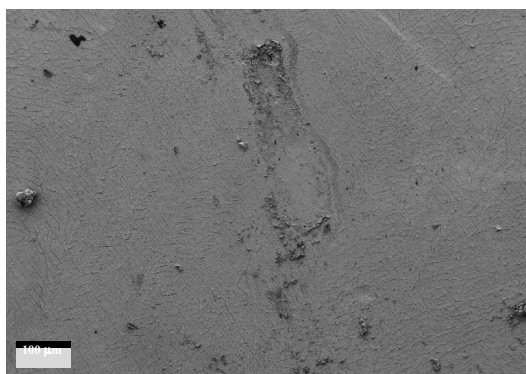

e)

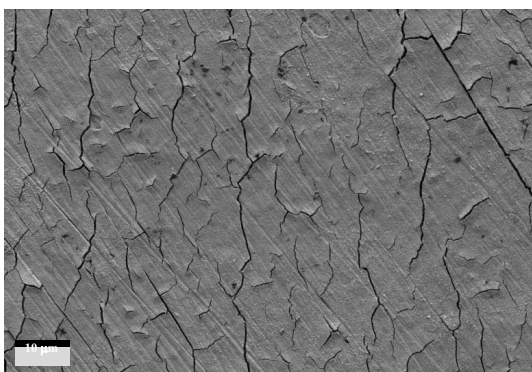

f)

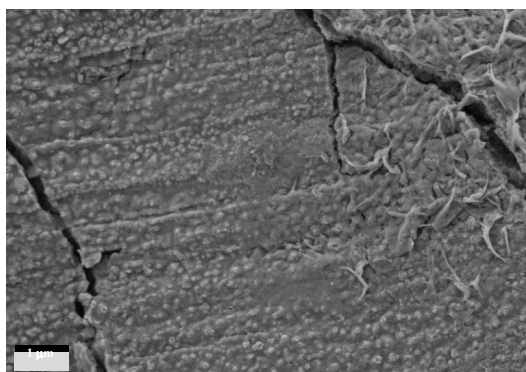

**Figure S3.** FE-SEM images of the ZnO/ZnS heterostructures anodized under static (a-c) and dynamic conditions (d-f) in 0.06M Na<sub>2</sub>S+0.0125M glycerol/water electrolytes.

a)

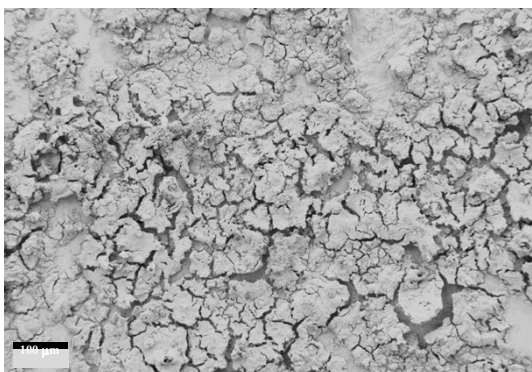

b)

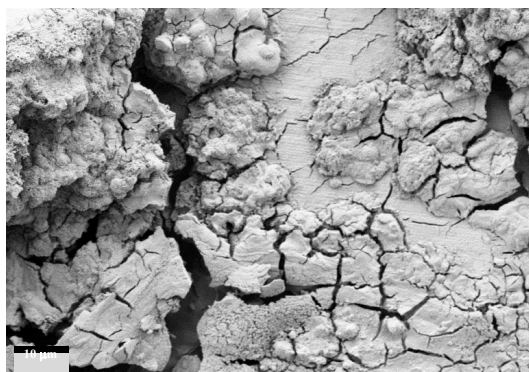

c)

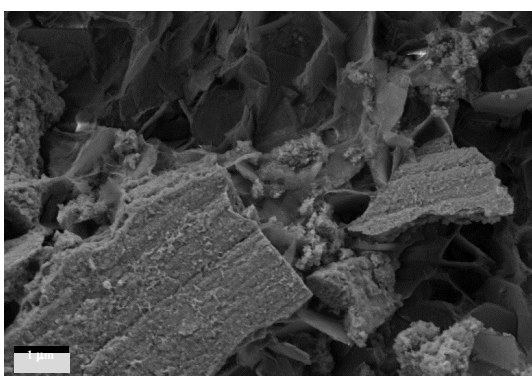

d)

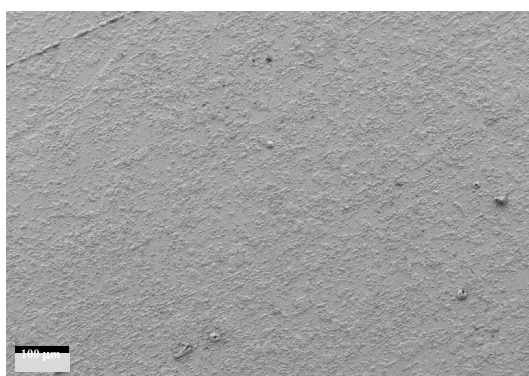

e)

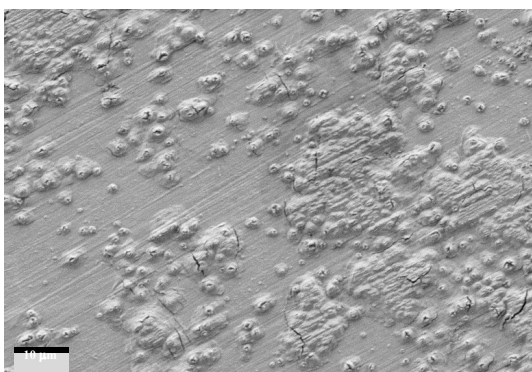

f)

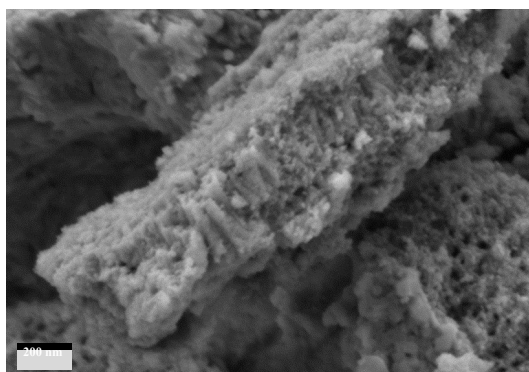

**Figure S4.** FE-SEM images of the ZnO/ZnS heterostructures anodized under static (a-c) and dynamic conditions (d-f) in 0.2M Na<sub>2</sub>S+0.0125M glycerol/water electrolytes.

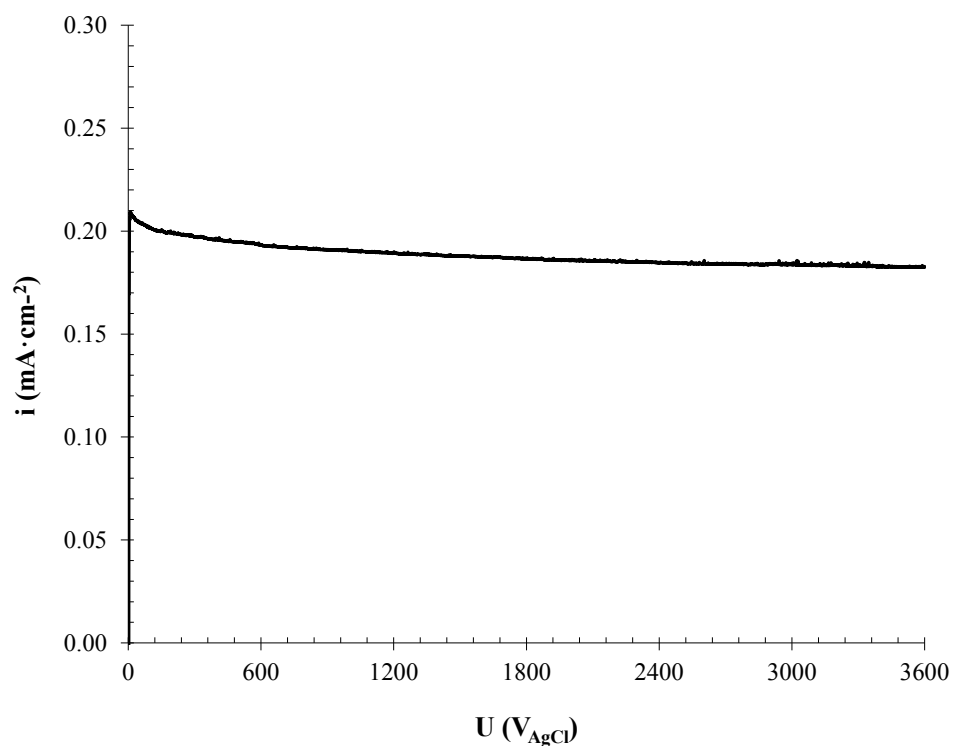

**Figure S5.** Photostability in 0.24M Na<sub>2</sub>S and 0.35M Na<sub>2</sub>SO<sub>3</sub> solution during 1 hour of the heterostructure anodized in 0.2M Na<sub>2</sub>S + 0.025M NH<sub>4</sub>F glycerol/water solution stirring the electrolyte at 2000 rpm, holding at 500 mV the potential under AM 1.5 illumination
